# Supplementary material
Source: publisher site journal article supplement (https://www.dovepress.com/article/418345)
Supplement: Supplementary file 1 [file get_supplementary_file.php]

**A**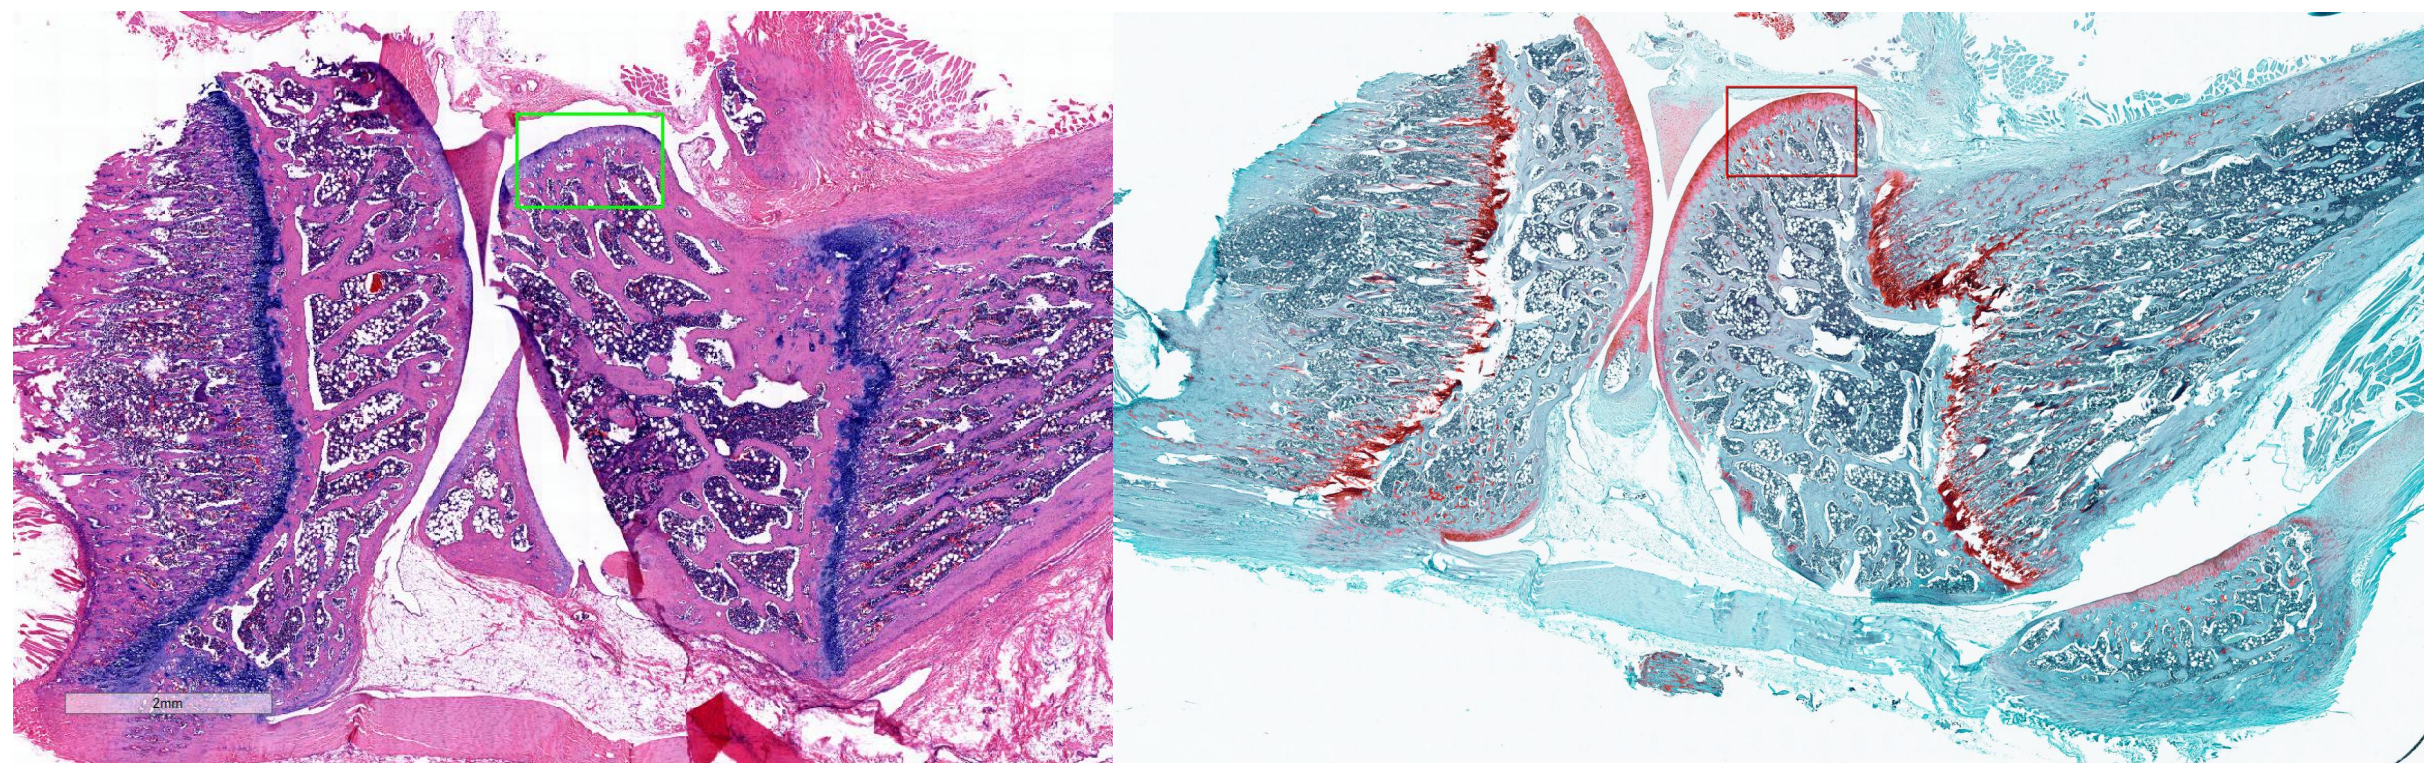**B**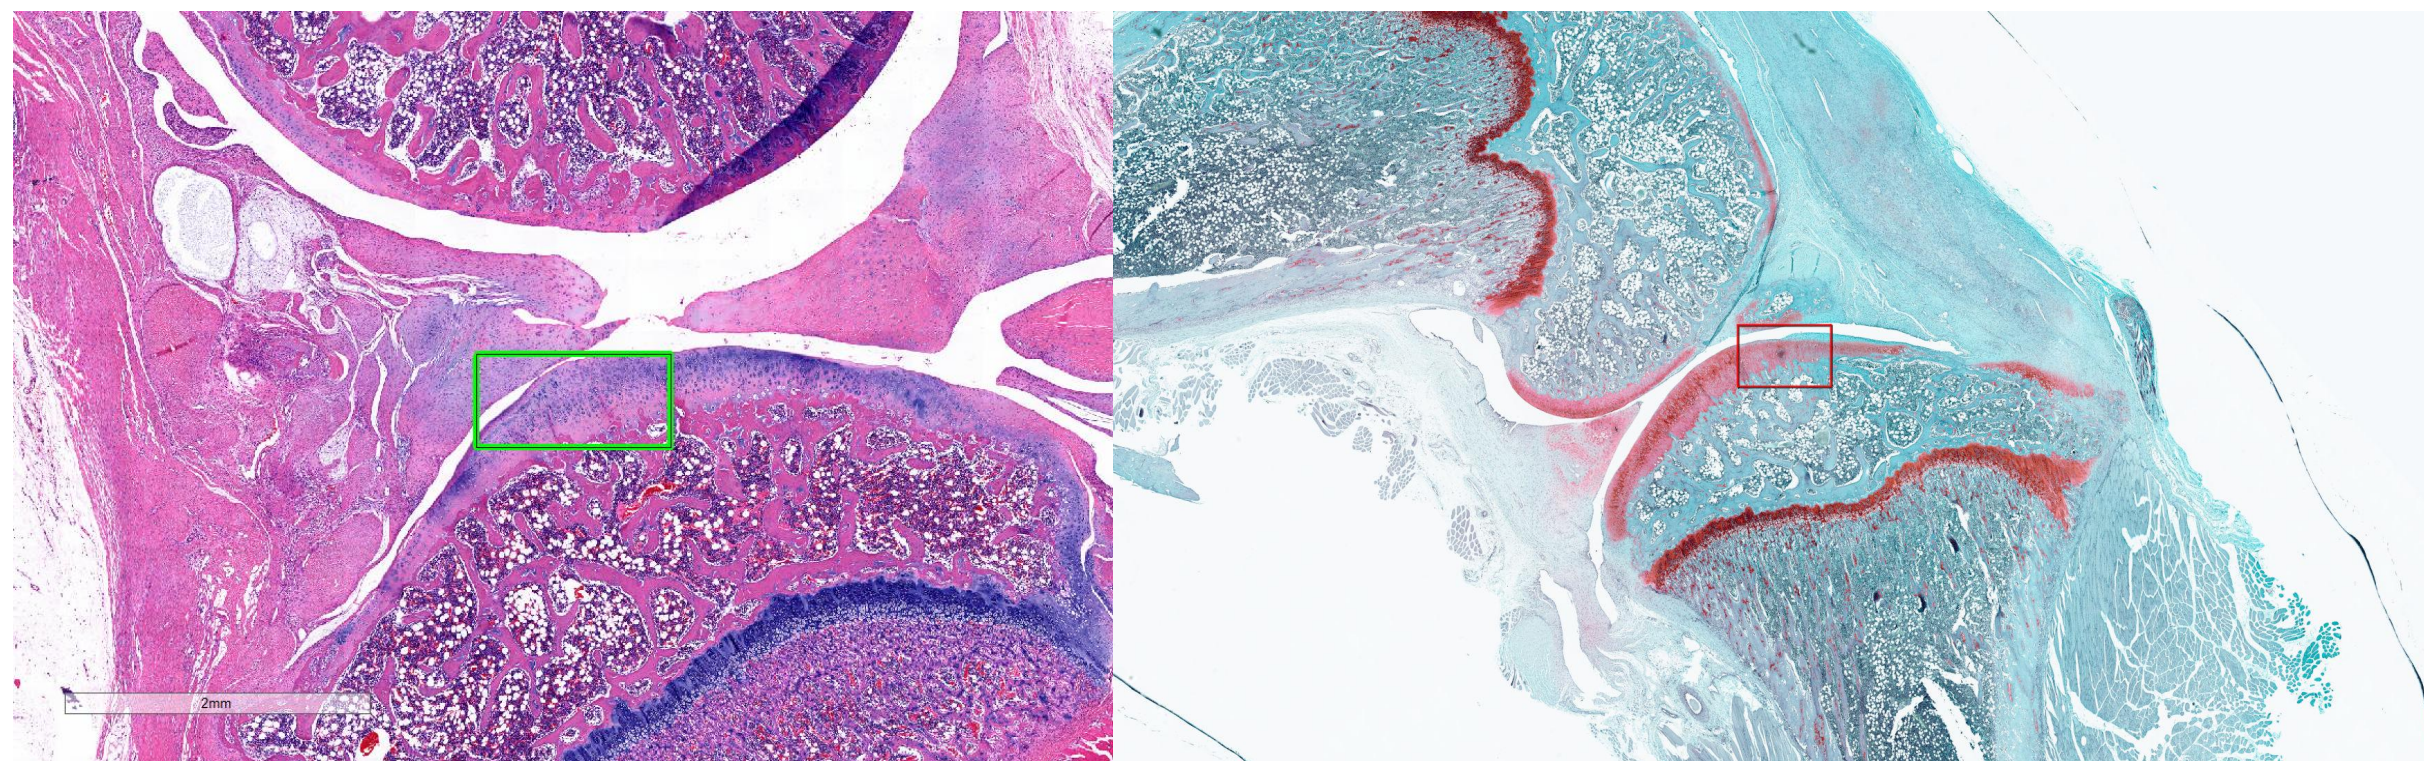**C**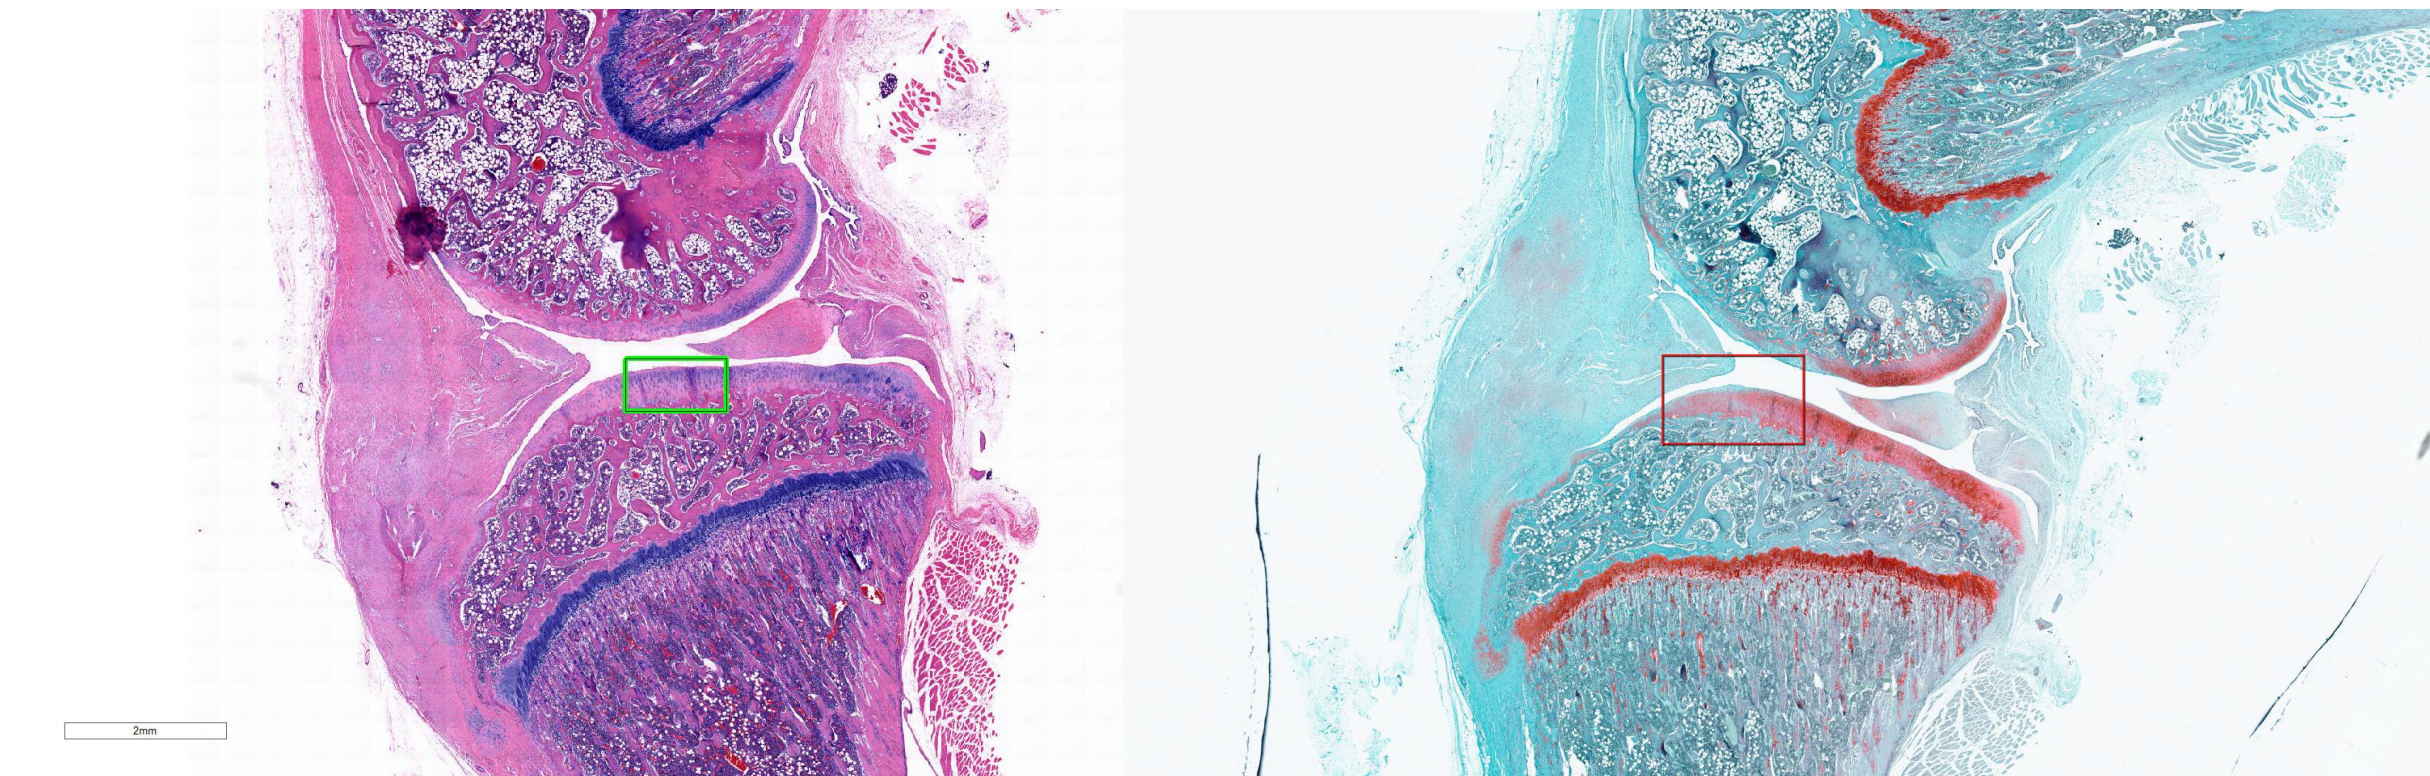**D**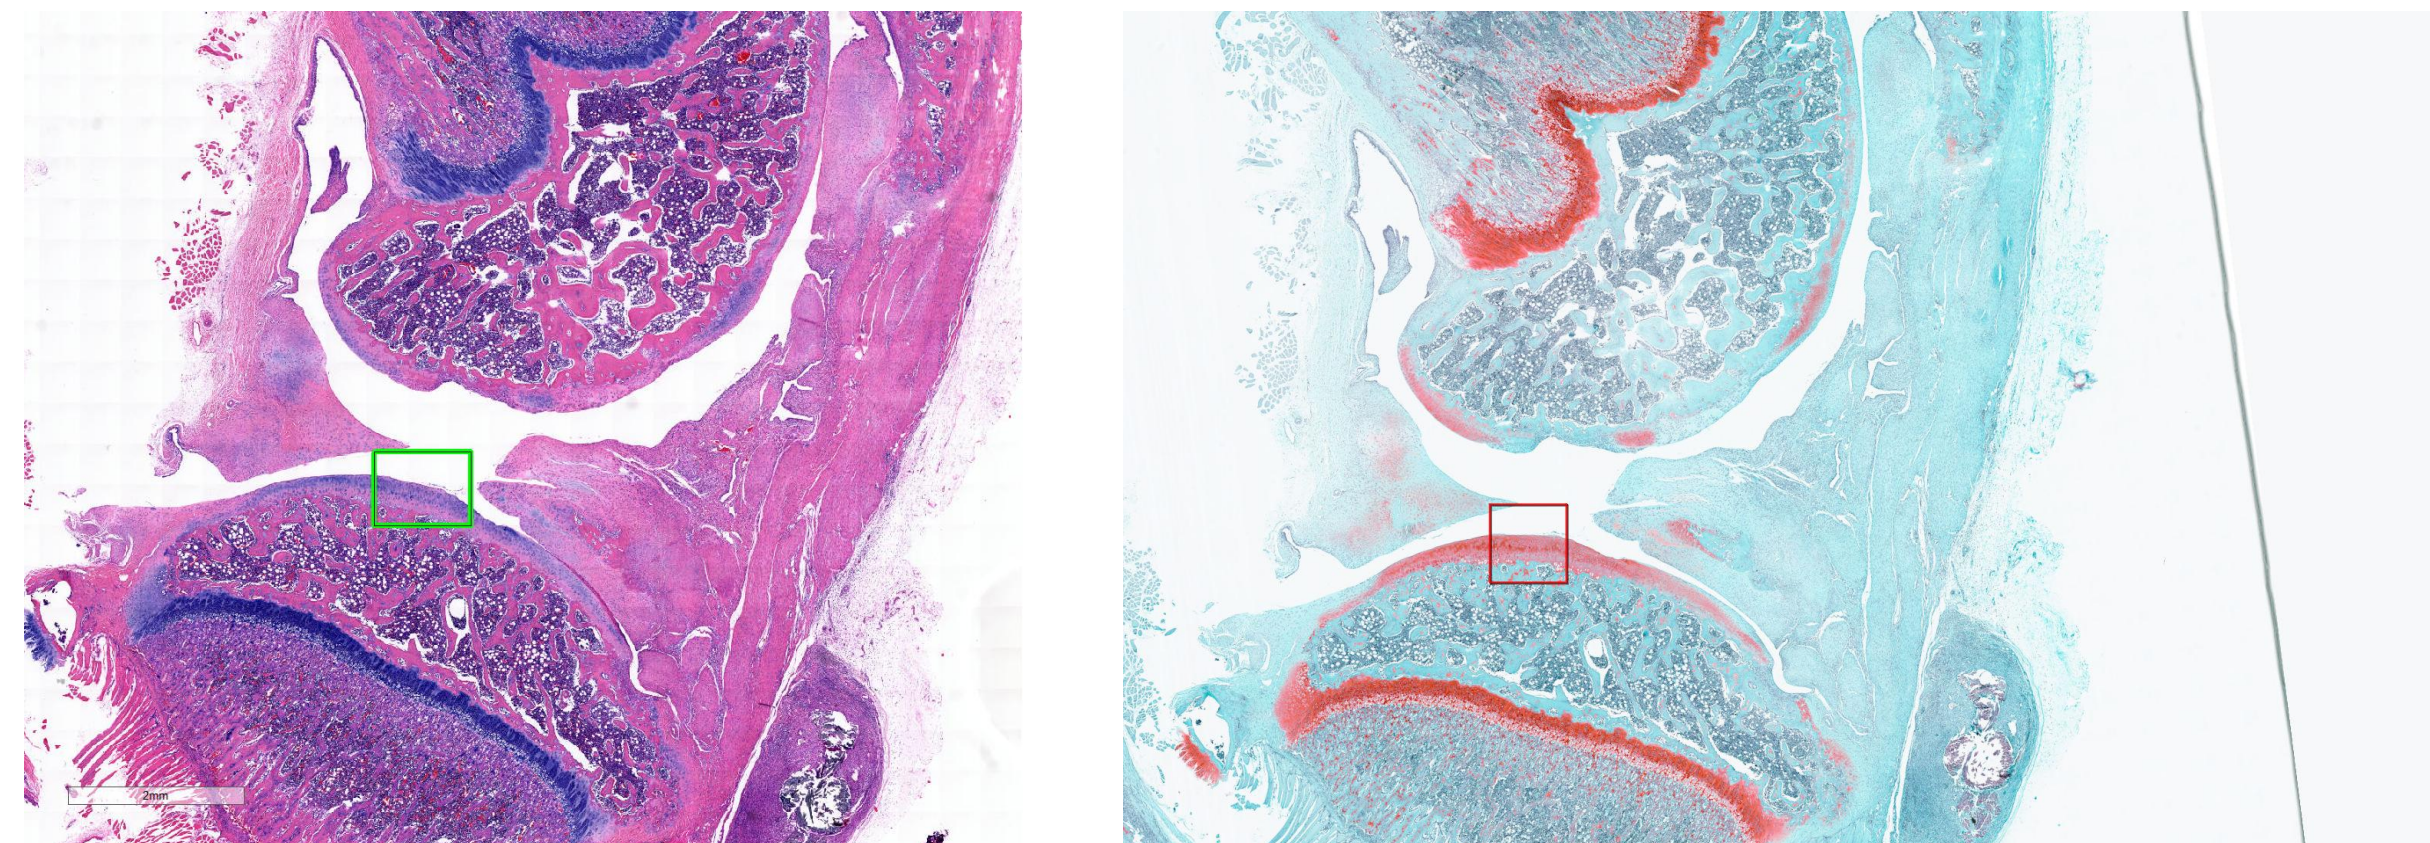

(A) HE staining and safranin-O/fast green staining of blank control group.

(B) HE staining and safranin-O/fast green staining of Hulth model group.

(C) HE staining and safranin-O/fast green staining of TFRD treated group.

(D) HE staining and safranin-O/fast green staining of glucosamine hydrochloride treated group.
